# Supplementary material
Source: Royal Society of Chemistry journal article supplement (doi:10.1039/d5ta10015a)
Supplement: d5ta10015a1.pdf [file d5ta10015a1.pdf]

## Supporting Information

# Bottom-Up Redox State Engineering of Ni/GDC Thin-Film Anodes for Carbon Tolerant Syngas- Fueled SOFCs

*Inyoung Jeong,<sup>1†</sup> Daniel Gil,<sup>1</sup> Myung Seok Lee,<sup>1</sup> Yujae Jang,<sup>1</sup> Hyungjun Kim,<sup>1,2\*</sup> and Suk  
Won Cha<sup>1\*</sup>*

<sup>1</sup>Department of Mechanical Engineering, Seoul National University, 1 Gwanak-ro, Gwanak-  
gu, Seoul 08826, Republic of Korea

<sup>2</sup>Department of Materials Science and Engineering, Northwestern University, Evanston,  
Illinois 60208, United States

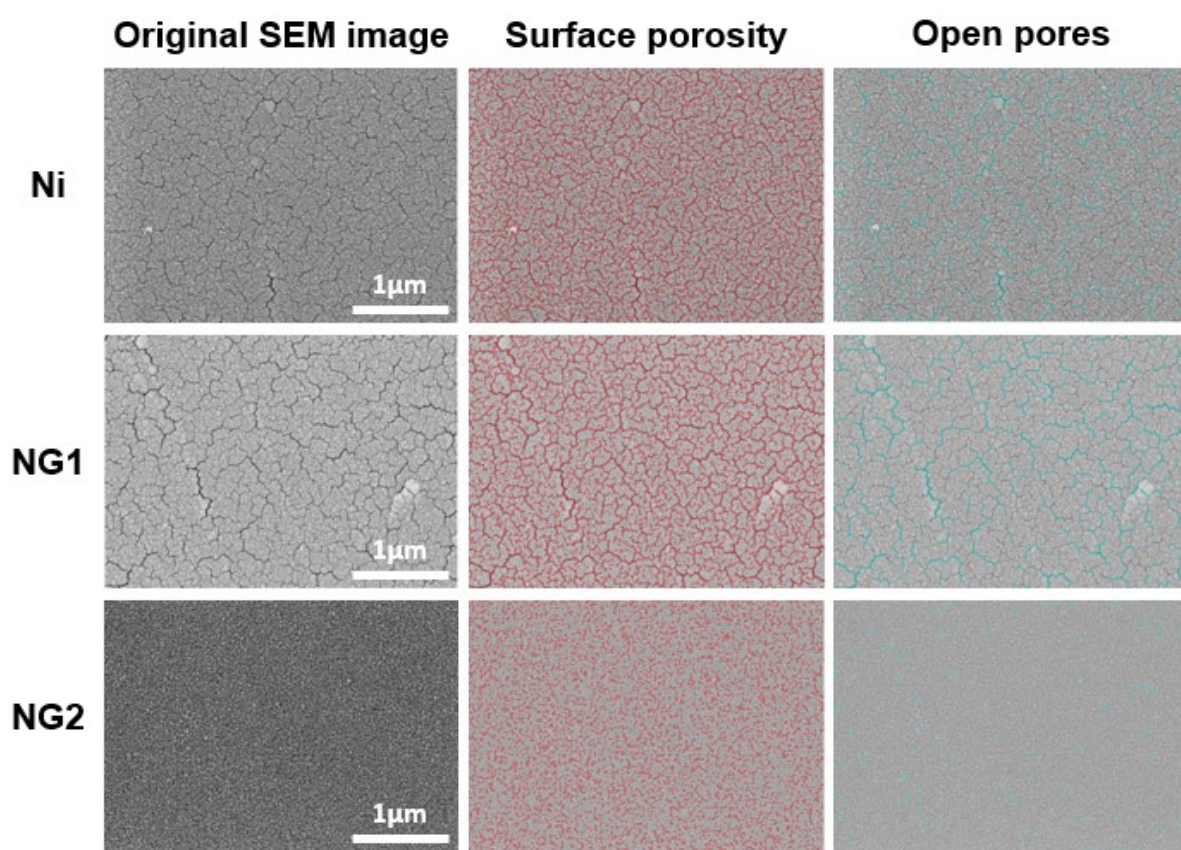

**Figure S1.** Quantitative analysis of the apparent surface porosity of the as-fabricated Ni, NG1, and NG2 anodes based on top-view FESEM images. For each anode, the original SEM image, the segmented open-pore regions used to calculate the total surface porosity, and the segmented coarse open-pore regions are shown. The estimated surface porosities were 29.57%, 29.29%, and 24.27% for Cells Ni, NG1, and NG2, respectively, while the corresponding coarse open-pore fractions were 5.21%, 6.47%, and 0.94%.

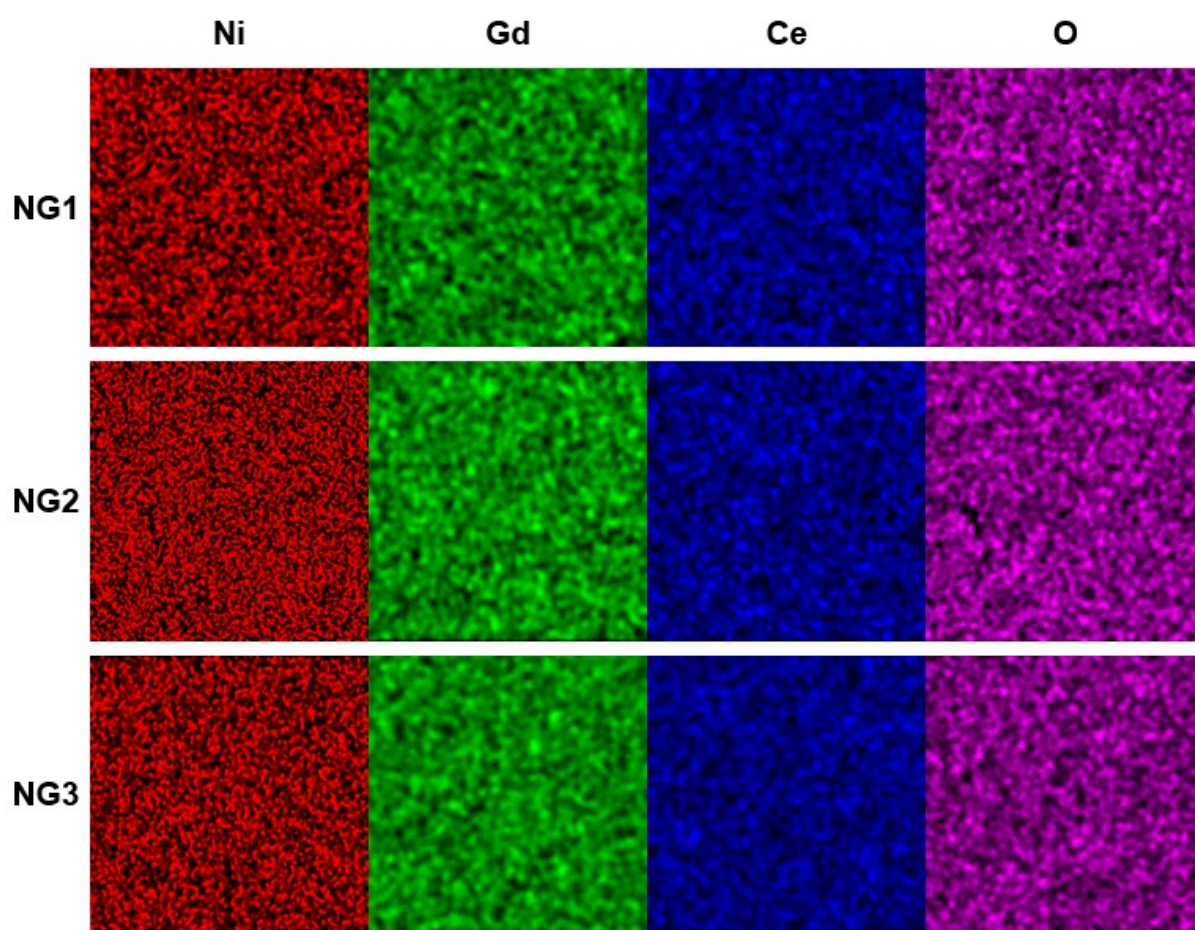

**Figure S2.** FESEM-EDS characterization of as-deposited Ni–GDC thin films

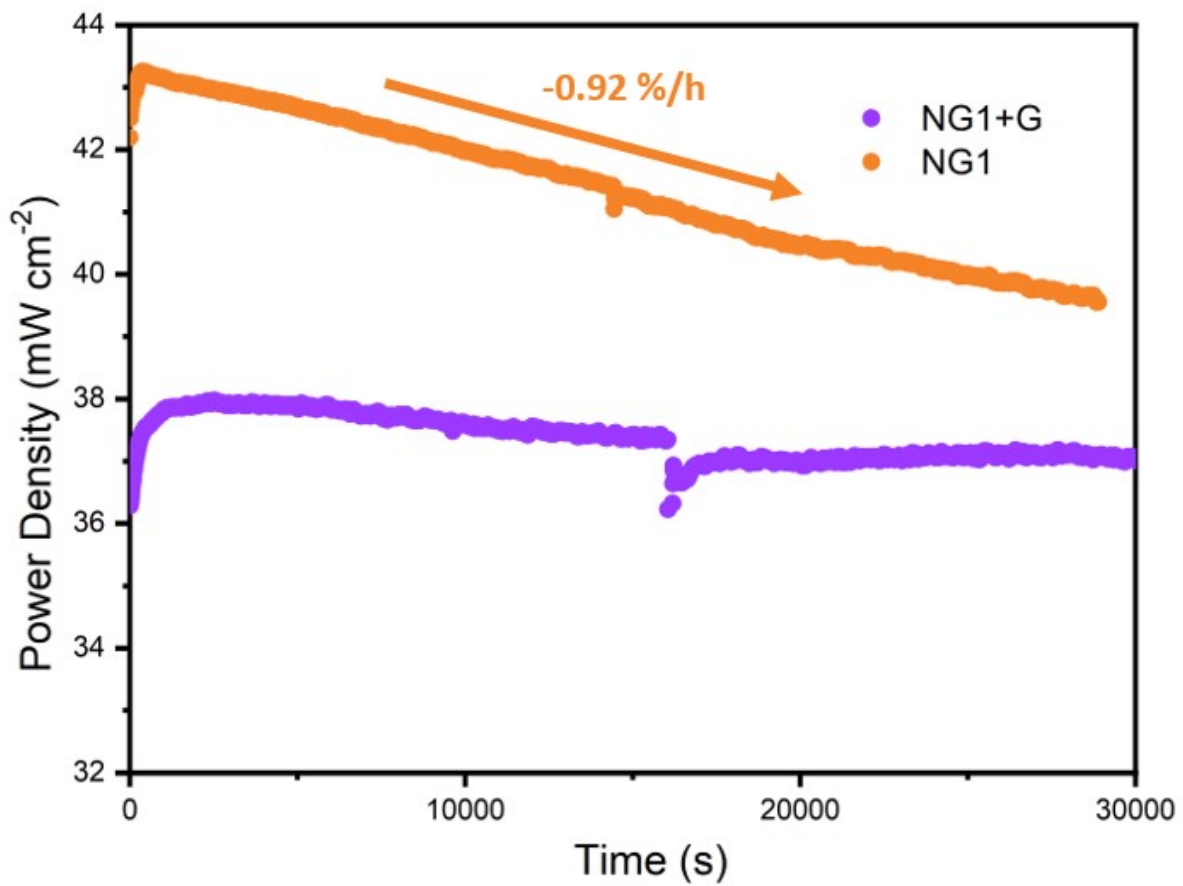

**Figure S3.** Long-term galvanostatic stability test of NG1 and NG1+G cells operated at 0.8 A for 9 hours under syngas conditions.

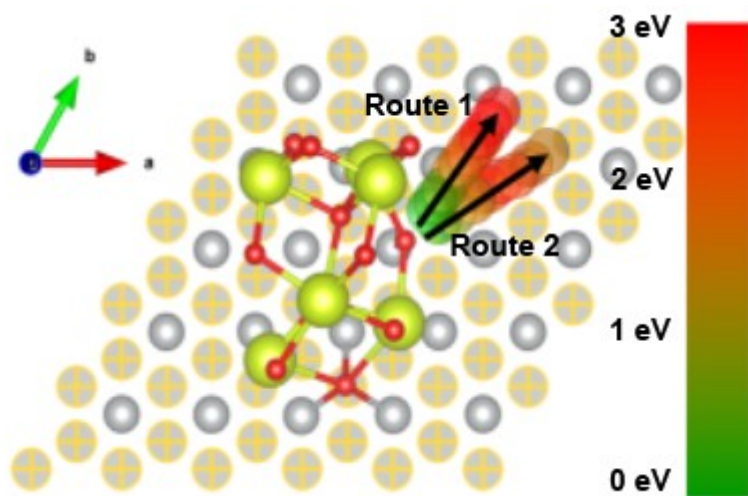

**Figure S4.** Energy landscape for CO adsorption at different sites on the Ni-ceria oxide interface, comparing Route 1 (fcc site) and Route 2 (bridge site). The color gradient represents adsorption energy, with lower energy (green) indicating more favorable adsorption.

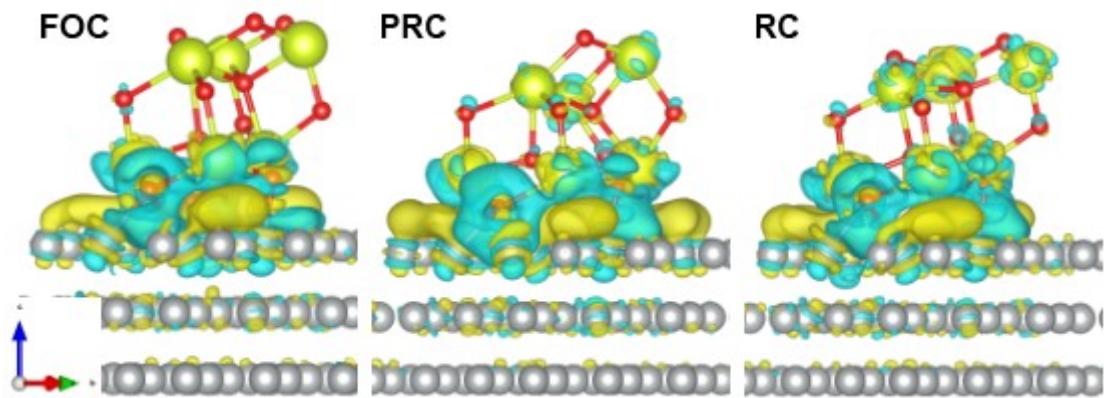

**Figure S5.** Energy density difference maps of the Ni-ceria oxide interfaces for the fully oxidized (FOC), partially reduced (PRC), and reduced (RC) ceria models. Yellow and cyan regions represent electron accumulation and depletion, respectively.

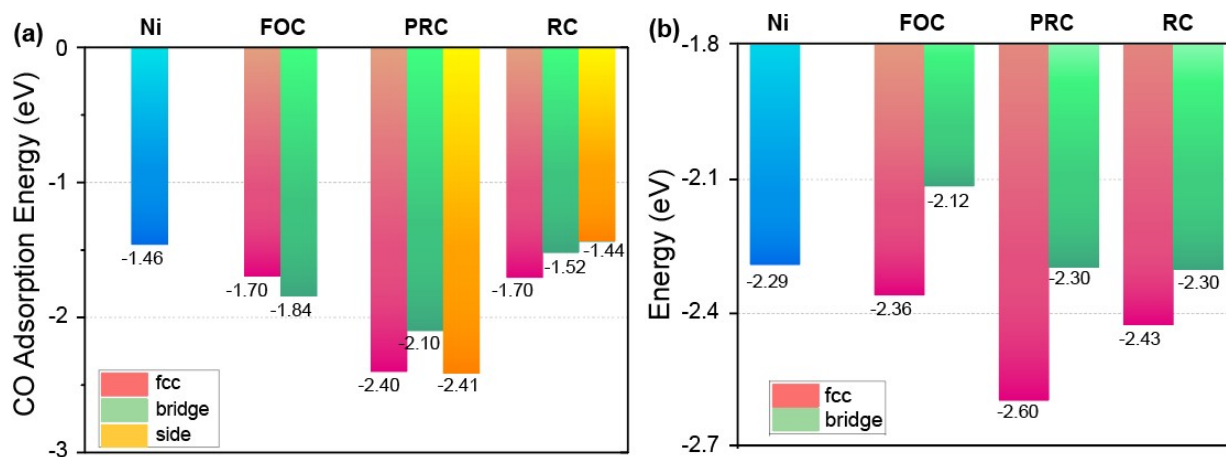

**Figure S6.** (a) CO adsorption energies on Ni and CeO<sub>2</sub> cluster models (FOC, PRC, RC) at different adsorption sites (fcc, bridge, side). (b) Energy differences for the reverse Boudouard reaction calculated at fcc and bridge sites on the same surfaces.

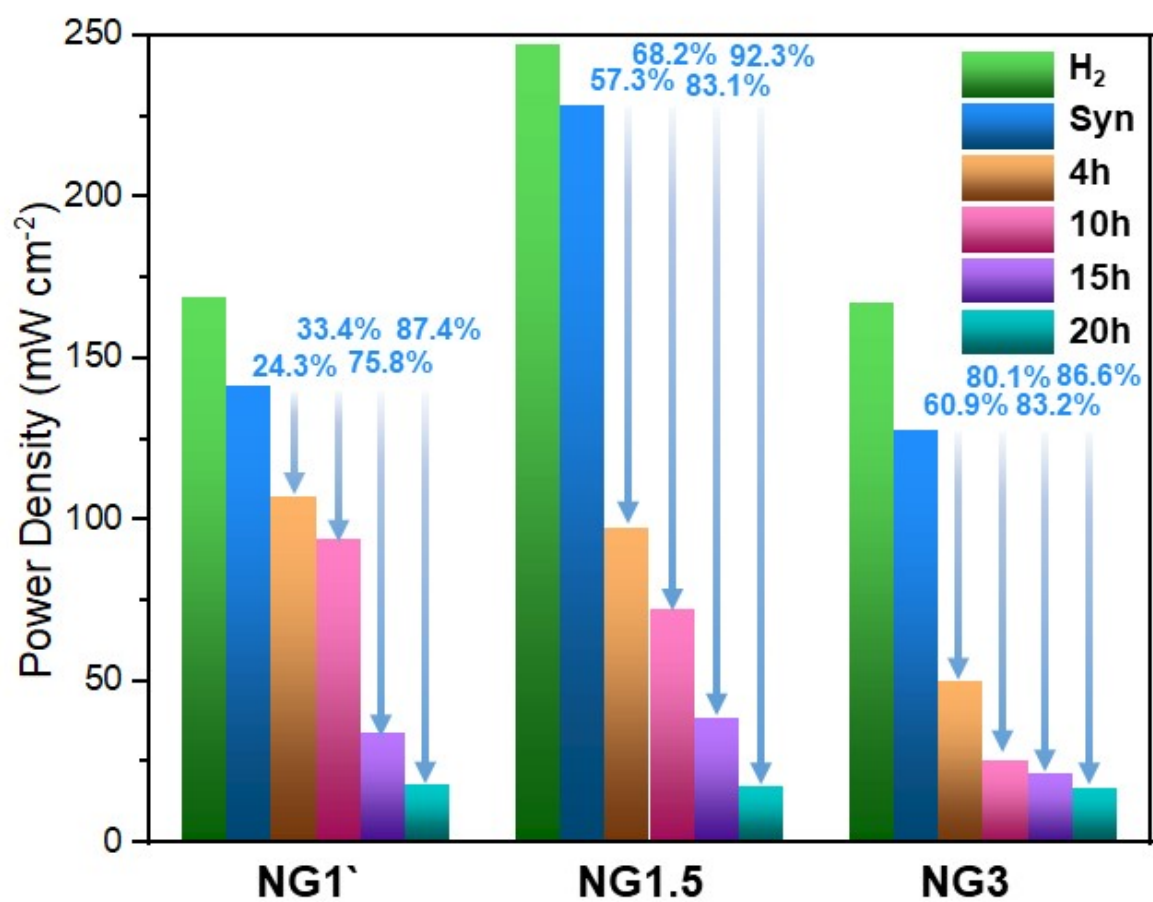

**Figure S7.** Power densities of NG1, NG1.5, and NG3 measured in H<sub>2</sub> and syngas, together with their evolution during extended 20 h syngas operation.

**Table S1.** EDS-derived elemental composition of the as-deposited Ni–GDC witness films

| Elements(atomic. %) | Cell Ni | Cell NG1 | Cell NG1.5 | Cell NG2 | Cell NG3 |
|---------------------|---------|----------|------------|----------|----------|
| Ni                  | 100.0   | 97.0     | 95.0       | 91.5     | 73.3     |
| Gd                  | 0       | 0.7      | 1.1        | 1.9      | 5.9      |
| Ce                  | 0       | 2.3      | 3.9        | 6.6      | 20.8     |
